## Corrigendum

Corrigendum to: Genetic evaluation including intermediate omics features

Ole F. Christensen , Vinzent Börner, Luis Varona, and Andres Legarra 

Genetics, 2021, <https://doi.org/10.1093/genetics/iyab130>

When the pdf of this paper was first published, there was an error in equation 15. It appeared as

$$\begin{bmatrix} \mathbf{X}^T\mathbf{X} & & & \\ \mathbf{Z}^T\mathbf{X} & \mathbf{Z}^T\mathbf{Z} + \xi_1\mathbf{\Omega}^{-1} & \mathbf{X}^T\mathbf{Z} & \\ & & \mathbf{X}^T\mathbf{Z} & \\ & & & \mathbf{X}^T\mathbf{Z} \end{bmatrix} \begin{bmatrix} \hat{\beta} \\ \hat{\mathbf{u}} \\ \hat{\mathbf{a}}_r \end{bmatrix} = \begin{bmatrix} \mathbf{X}^T\mathbf{y} \\ \mathbf{Z}^T\mathbf{y} \\ \mathbf{Z}^T\mathbf{y} \end{bmatrix}, \tag{15}$$

It should have appeared as

$$\begin{bmatrix} \mathbf{X}^T\mathbf{X} & \mathbf{X}^T\mathbf{Z} & \mathbf{X}^T\mathbf{Z} \\ \mathbf{Z}^T\mathbf{X} & \mathbf{Z}^T\mathbf{Z} + \xi_1\mathbf{\Omega}^{-1} & \mathbf{Z}^T\mathbf{Z} \\ \mathbf{Z}^T\mathbf{X} & \mathbf{Z}^T\mathbf{Z} & \mathbf{Z}^T\mathbf{Z} + \xi_2\mathbf{H}^{-1} \end{bmatrix} \begin{bmatrix} \hat{\beta} \\ \hat{\mathbf{u}} \\ \hat{\mathbf{a}}_r \end{bmatrix} = \begin{bmatrix} \mathbf{X}^T\mathbf{y} \\ \mathbf{Z}^T\mathbf{y} \\ \mathbf{Z}^T\mathbf{y} \end{bmatrix}, \tag{15}$$

This has now been corrected online.
